# Supplementary material
Source: PubMed Central journal article supplement (PMC2669282)
Supplement: NIHMS101452-supplement-supplement_1.pdf [file NIHMS101452-supplement-supplement_1.pdf]

## Supplementary Material

Currently Pregnant Women Analyses

Supplementary Table 1. Twelve-Month Percentage Distributions and Odds Ratios (OR) of Sociodemographic Characteristics and Pregnancy Status.

| Characteristic                                                             | Currently Pregnant Women (N=453) |              | Non-Pregnant Women (N=13,025) |              | OR (CI)                 |
|----------------------------------------------------------------------------|----------------------------------|--------------|-------------------------------|--------------|-------------------------|
|                                                                            | %                                | SE           | %                             | SE           |                         |
| Race/ethnicity                                                             |                                  |              |                               |              |                         |
| White                                                                      | 59.4                             | (3.0)        | 67.0                          | (1.9)        | 1.0                     |
| Black                                                                      | 14.3                             | (2.0)        | 13.2                          | (0.8)        | 1.22 (0.87-1.71)        |
| Native American                                                            | 2.9                              | (1.3)        | 2.1                           | (0.2)        | 1.57 (0.62-3.98)        |
| Asian                                                                      | 7.7                              | (2.1)        | 4.9                           | (0.6)        | 1.77 (1.04-3.02)        |
| Hispanic                                                                   | 15.7                             | (2.3)        | 12.9                          | (1.4)        | 1.38 (1.05-1.80)        |
| Nativity                                                                   |                                  |              |                               |              |                         |
| US-born                                                                    | 82.2                             | (2.6)        | 84.8                          | (1.5)        | 1.0                     |
| Foreign-born                                                               | 17.9                             | (2.6)        | 15.2                          | (1.5)        | 1.21 (0.94-1.57)        |
| Age, y                                                                     |                                  |              |                               |              |                         |
| 18-25                                                                      | 39.3                             | (2.7)        | 21.0                          | (0.5)        | 2.44 (1.93-3.07)        |
| 26-50                                                                      | 60.7                             | (2.7)        | 79.0                          | (0.5)        | 1.0                     |
| Marital status                                                             |                                  |              |                               |              |                         |
| Married/cohabiting                                                         | 81.2                             | (2.0)        | 59.6                          | (0.7)        | 1.0                     |
| Widowed/separated/divorced                                                 | 2.9                              | (0.7)        | 13.4                          | (0.4)        | 0.16 (0.10-2.56)        |
| Never married                                                              | 15.8                             | (1.9)        | 27.0                          | (0.7)        | 0.43 (0.32-0.59)        |
| Education                                                                  |                                  |              |                               |              |                         |
| Less than high school                                                      | 15.4                             | (2.0)        | 11.2                          | (0.7)        | 1.0                     |
| High school                                                                | 29.1                             | (2.5)        | 27.0                          | (0.6)        | 0.78 (0.57-1.07)        |
| College or higher                                                          | 55.5                             | (2.9)        | 61.9                          | (0.8)        | 0.65 (0.48-0.87)        |
| <b>Personal Annual income, \$</b>                                          |                                  |              |                               |              |                         |
| 0-19999                                                                    | 67.1                             | (2.7)        | 56.1                          | (0.8)        | 1.0                     |
| 20000-34999                                                                | 17.9                             | (2.3)        | 22.6                          | (0.5)        | 0.66 (0.48-0.91)        |
| 35000-69999                                                                | 11.9                             | (1.7)        | 17.5                          | (0.6)        | 0.57 (0.41-0.77)        |
| 70000                                                                      | 3.2                              | (1.1)        | 3.7                           | (0.3)        | 0.71 (0.37-1.40)        |
| Urbanicity                                                                 |                                  |              |                               |              |                         |
| Rural                                                                      | 42.9                             | (4.6)        | 62.7                          | (2.6)        | 1.27 (0.94-1.70)        |
| Urban                                                                      | 57.1                             | (4.6)        | 37.3                          | (2.6)        | 1.0                     |
| Region                                                                     |                                  |              |                               |              |                         |
| Northwest                                                                  | 21.0                             | (4.7)        | 19.6                          | (3.5)        | 1.01 (0.69-1.48)        |
| Midwest                                                                    | 20.0                             | (4.2)        | 22.9                          | (3.4)        | 0.83 (0.55-1.23)        |
| South                                                                      | 35.3                             | (4.4)        | 35.2                          | (3.5)        | 0.95 (0.67-1.34)        |
| West                                                                       | 23.7                             | (4.8)        | 22.3                          | (3.7)        | 1.0                     |
| Parity                                                                     |                                  |              |                               |              |                         |
| Nullipara                                                                  | 38.9                             | (3.0)        | 32.9                          | (0.7)        | 1.30 (1.01-1.67)        |
| Multipara <sup>a</sup>                                                     | 61.1                             | (3.0)        | 67.1                          | (0.7)        | 1.0                     |
| Insurance                                                                  |                                  |              |                               |              |                         |
| Private                                                                    | 60.2                             | (2.9)        | 68.8                          | (1.0)        | 1.22 (0.89-1.68)        |
| Public                                                                     | 23.5                             | (2.5)        | 8.5                           | (0.4)        | 3.87 (2.70-5.55)        |
| None                                                                       | 16.3                             | (2.0)        | 22.8                          | (0.8)        | 1.0                     |
| Overall Health                                                             |                                  |              |                               |              |                         |
| Overall Health (Good, very good, or excellent)                             | <b>95.9</b>                      | <b>(0.9)</b> | <b>89.6</b>                   | <b>(0.4)</b> | <b>2.75 (1.69-4.49)</b> |
| Stressful Life Events                                                      |                                  |              |                               |              |                         |
| Mean # of Stressful Life events                                            | <b>1.8</b>                       | <b>(0.1)</b> | <b>1.8</b>                    | <b>(0.3)</b> | <b>0.99 (0.92-1.07)</b> |
| Break up of romantic relationship/Separation/divorce in the last 12 months | <b>6.2</b>                       | <b>(1.2)</b> | <b>8.2</b>                    | <b>(0.3)</b> | <b>0.74 (0.49-1.14)</b> |
| History of trauma/victimization in the last 12 months                      | <b>6.1</b>                       | <b>(1.2)</b> | <b>4.6</b>                    | <b>(0.2)</b> | <b>1.36 (0.88-2.09)</b> |

Abbreviations: SE, Standard Error; OR, Odds Ratio; CI, 95% confidence interval

<sup>a</sup> one or more children

Supplementary Table 2. Twelve-Month Prevalence and Odds Ratios(OR) of DSM-IV Axis I Psychiatric Disorders and Pregnancy Status.

|                                                                                    | Currently Pregnant Women (N=453) |            | Non-Pregnant Women (N=13,025) |            | OR (CI)               | AOR <sup>a</sup> (CI)                      |
|------------------------------------------------------------------------------------|----------------------------------|------------|-------------------------------|------------|-----------------------|--------------------------------------------|
|                                                                                    | %                                | SE         | %                             | SE         |                       |                                            |
| Any psychiatric disorder                                                           | 20.3                             | (2.0)      | 30.1                          | (0.8)      | 0.59 (0.46-0.76)      | <b>0.55 (0.39-0.78)</b>                    |
| Any new onset psychiatric disorder (current but not prior to the past 12 months t) | 6.5                              | (1.3)      | 7.0                           | (0.3)      | 0.92 (0.59-1.42)      | <b>0.85 (0.54-1.33)</b>                    |
| Any substance use disorder                                                         | 17.4                             | (2.3)      | 19.9                          | (0.7)      | 0.84 (0.61-1.16)      | <b>0.35 (0.18-0.68)</b>                    |
| Any alcohol use disorder                                                           | 2.8                              | (0.9)      | 7.6                           | (0.4)      | 0.35 (0.19-0.66)      | <b>0.37 (0.18-0.73)</b>                    |
| Any drug use disorder                                                              | 1.6                              | (0.7)      | 2.0                           | (0.2)      | 0.83 (0.36-1.95)      | <b>0.49 (0.17-1.41)</b>                    |
| Nicotine dependence                                                                | 15.6                             | (2.2)      | 14.6                          | (0.6)      | 1.08 (0.77-1.51)      | <b>1.22 (0.86-1.72)</b>                    |
| Any mood disorder                                                                  | 8.5                              | (1.6)      | 13.7                          | (0.5)      | 0.59 (0.39-0.87)      | <b>0.60 (0.39-0.91)</b>                    |
| MDD                                                                                | 5.6                              | (1.3)      | 8.1                           | (0.9)      | 0.64 (0.39-1.06)      | <b>0.74 (0.45-1.21)</b>                    |
| Dysthymia                                                                          | 1.0                              | (0.5)      | 2.0                           | (0.2)      | 0.52 (0.17-1.52)      | <b>0.52 (0.13-2.02)</b>                    |
| Bipolar disorder                                                                   | 1.4                              | (0.5)      | 2.3                           | (0.2)      | 0.63 (0.30-1.33)      | <b>0.59 (0.22-1.62)</b>                    |
| Any anxiety disorder                                                               | 12.2                             | (1.8)      | 14.9                          | (0.6)      | 0.80 (0.57-1.11)      | <b>1.31 (0.73-2.36)</b>                    |
| Panic disorder                                                                     | 1.4                              | (0.9)      | 3.0                           | (0.2)      | 0.45 (0.13-1.58)      | <b>0.74 (0.21-2.60)</b>                    |
| Social anxiety disorder                                                            | 3.0                              | (0.9)      | 2.8                           | (0.2)      | 1.08 (0.58-2.01)      | <b>1.11 (0.36-3.39)</b>                    |
| Specific phobia                                                                    | 8.3                              | (1.5)      | 10.2                          | (0.5)      | 0.80 (0.54-1.19)      | <b>1.04 (0.40-2.71)</b>                    |
| Generalized anxiety                                                                | 1.3                              | (0.6)      | 1.8                           | (0.2)      | 0.70 (0.26-1.85)      | <b>1.87 (0.67-5.25)</b>                    |
| Any psychotic disorder                                                             | 0.1                              | (0.1)      | 0.3                           | (0.1)      | 0.44 (0.08-2.45)      | --                                         |
| Any substance use                                                                  | 61.7                             | (3.1)      | 73.8                          | (1.0)      | 0.57 (0.45-0.73)      | --                                         |
| Any alcohol use                                                                    | 57.7                             | (3.1)      | 68.5                          | (0.9)      | 0.63 (0.49-0.80)      | --                                         |
| Any tobacco use                                                                    | 21.7                             | (2.3)      | 26.6                          | (0.8)      | 0.77 (0.58-1.01)      | --                                         |
| Any illicit drug use                                                               | 4.0                              | (1.0)      | 6.8                           | (0.3)      | 0.58 (0.34-0.98)      | --                                         |
| <b>Mean number of cigarettes smoked per day in last year (only among smokers)</b>  | <b>17.0<sup>b</sup></b>          | <b>2.4</b> | <b>15.9<sup>b</sup></b>       | <b>0.3</b> | <b>t=0.48, p=0.63</b> | <b>B=0.06, SE=0.06, p=0.30<sup>c</sup></b> |

Abbreviations: SE, Standard Error; OR, Odds Ratio; AOR, Adjusted Odds Ratio; CI, 95% confidence interval.

<sup>a</sup> Odds ratios adjusted for race/ethnicity, nativity, age, marital status, education, parity, lifetime history of row-defined disorder (disorder occurring prior to the past 12 months), overall health and number of stressful life events.

<sup>b</sup> Mean

<sup>c</sup> Linear regression controlled for race/ethnicity, nativity, age, marital status, education, parity, overall health and stressful life events.

Supplementary Table 3. Twelve-Month Percentage Distributions and Odds Ratios (OR) of Sociodemographic Characteristics and Pregnancy and Psychiatric Status.

| Characteristic                                                            | Currently Pregnant Women with Any Psychiatric Disorder <sup>a</sup> (N=98) |       | Currently Pregnant Women without Any Psychiatric Disorder (N=355) |       | OR (CI)          | AOR <sup>b</sup> (CI) |
|---------------------------------------------------------------------------|----------------------------------------------------------------------------|-------|-------------------------------------------------------------------|-------|------------------|-----------------------|
|                                                                           | %                                                                          | SE    | %                                                                 | SE    |                  |                       |
| Race/ethnicity                                                            |                                                                            |       |                                                                   |       |                  |                       |
| White                                                                     | 61.4                                                                       | (5.4) | 58.9                                                              | (3.4) | 1.0              | 1.0                   |
| Black                                                                     | 19.1                                                                       | (4.0) | 13.1                                                              | (2.3) | 1.39 (0.72-2.71) | 1.08 (0.48-2.43)      |
| Native American                                                           | 0.9                                                                        | (0.9) | 3.4                                                               | (1.6) | 0.24 (0.03-2.26) | 0.16 (0.01-1.80)      |
| Asian                                                                     | 4.7                                                                        | (2.6) | 8.4                                                               | (2.4) | 0.54 (0.17-1.74) | 1.03 (0.32-3.27)      |
| Hispanic                                                                  | 13.9                                                                       | (3.8) | 16.2                                                              | (2.5) | 0.82 (0.41-1.64) | 0.99 (0.42-2.37)      |
| Age                                                                       |                                                                            |       |                                                                   |       |                  |                       |
| 18-25                                                                     | 54.6                                                                       | (6.0) | 35.4                                                              | (3.0) | 2.20 (1.24-3.88) | 1.97 (1.01-3.82)      |
| 25-50                                                                     | 45.4                                                                       | (6.0) | 64.6                                                              | (3.0) | 1.0              | 1.0                   |
| Marital status                                                            |                                                                            |       |                                                                   |       |                  |                       |
| Married/cohabiting                                                        | 70.7                                                                       | (5.4) | 83.9                                                              | (2.2) | 1.0              | 1.0                   |
| Widowed/separated/divorced                                                | 2.8                                                                        | (1.2) | 3.0                                                               | (0.8) | 1.10 (0.39-3.12) | 1.08 (0.37-3.13)      |
| Never married                                                             | 26.5                                                                       | (5.3) | 13.1                                                              | (2.1) | 2.40 (1.18-4.86) | 1.78 (0.75-4.24)      |
| Education                                                                 |                                                                            |       |                                                                   |       |                  |                       |
| Less than high school                                                     | 16.8                                                                       | (4.9) | 15.0                                                              | (2.3) | 1.0              | 1.0                   |
| High school                                                               | 35.2                                                                       | (5.8) | 27.6                                                              | (2.8) | 1.14 (0.45-2.87) | 1.13 (0.45-2.88)      |
| College or higher                                                         | 48.0                                                                       | (5.9) | 57.4                                                              | (3.2) | 0.75 (0.32-1.75) | 0.99 (0.41-2.41)      |
| Personal Annual income, \$                                                |                                                                            |       |                                                                   |       |                  |                       |
| 0-19999                                                                   | 68.5                                                                       | (5.6) | 66.7                                                              | (3.1) | 1.0              | 1.0                   |
| 20000-34999                                                               | 17.6                                                                       | (4.4) | 18.0                                                              | (2.6) | 0.96 (0.47-1.96) | 1.17 (0.54-2.54)      |
| 35000-69999                                                               | 12.3                                                                       | (3.8) | 11.7                                                              | (2.0) | 1.02 (0.44-2.38) | 1.51 (0.55-4.15)      |
| 70000                                                                     | 1.6                                                                        | (1.5) | 3.6                                                               | (1.3) | 0.43 (0.05-3.86) | 0.66 (0.06-6.92)      |
| Urbanicity                                                                |                                                                            |       |                                                                   |       |                  |                       |
| Rural                                                                     | 58.3                                                                       | (6.2) | 56.7                                                              | (5.1) | 0.94 (0.54-1.63) | 1.02 (0.56-1.83)      |
| Urban                                                                     | 41.7                                                                       | (6.2) | 43.3                                                              | (5.1) | 1.0              | 1.0                   |
| Region                                                                    |                                                                            |       |                                                                   |       |                  |                       |
| Northwest                                                                 | 14.2                                                                       | (4.6) | 22.8                                                              | (5.2) | 0.58 (0.27-1.26) | 0.59 (0.26-1.33)      |
| Midwest                                                                   | 23.3                                                                       | (5.4) | 19.2                                                              | (4.6) | 1.13 (0.54-2.33) | 0.92 (0.46-1.84)      |
| South                                                                     | 37.3                                                                       | (6.3) | 34.8                                                              | (4.5) | 1.00 (0.57-1.73) | 0.70 (0.39-1.26)      |
| West                                                                      | 25.1                                                                       | (6.3) | 23.3                                                              | (4.8) | 1.0              | 1.0                   |
| Parity                                                                    |                                                                            |       |                                                                   |       |                  |                       |
| Nullipara                                                                 | 40.8                                                                       | (5.8) | 38.4                                                              | (3.5) | 1.11 (0.63-1.94) | 1.08 (0.59-1.96)      |
| Multipara <sup>f</sup>                                                    | 59.2                                                                       | (5.8) | 61.6                                                              | (3.5) | 1.0              | 1.0                   |
| Pregnancy complications                                                   | 17.8                                                                       | (4.7) | 14.6                                                              | (2.6) | 1.26 (0.60-2.66) | 1.60 (0.74-3.43)      |
| Breakup of romantic relationship/separation/divorce in the last 12 months | 14.7                                                                       | (3.9) | 4.1                                                               | (1.2) | 4.05 (1.66-9.89) | 2.74 (0.95-7.88)      |
| Mean number of stressful life events in past year <sup>c</sup>            | 2.6                                                                        | (0.3) | 1.5                                                               | (0.1) | 1.34 (0.16-1.54) | 1.28 (1.11-1.49)      |
| Overall health (good, very good, or excellent) <sup>d</sup>               | 89.1                                                                       | (3.8) | 97.7                                                              | (0.7) | 0.19 (0.07-0.53) | 0.16 (0.06-0.43)      |
| History of trauma/victimization in the last 12 months <sup>e</sup>        | 8.4                                                                        | (3.2) | 5.5                                                               | (1.3) | 1.57 (0.58-4.25) | 1.56 (0.52-4.67)      |

Abbreviations: SE, Standard Error; AOR, Adjusted Odds Ratio; CI, 95% confidence interval.

<sup>a</sup>Psychiatric disorders included a past year diagnosis of any alcohol use disorder, any drug use disorder, nicotine dependence, MDD, dysthymia, bipolar disorder, panic disorder, social anxiety disorder, specific phobia, or generalized anxiety disorder.

<sup>b</sup>Odds ratios adjusted for race/ethnicity, nativity, age, marital status, education and parity.

<sup>c</sup>Odds of having a psychiatric disorder with each additional stressful life event in the past year.

<sup>d</sup>Overall health status assessed self-report perception of the respondents' health. Respondents were asked: "in general, would you say your health is excellent, very good, fair or poor?".

<sup>e</sup>History of trauma and victimization in the past 12 months was defined as being personally the victim of a crime or attempted crime, such as: being beat up, mugged or attacked by a stranger or someone they knew, being hit, threatened, or forced to have sex.

<sup>f</sup>one or more children

Supplementary Table 4. Prevalence and Odds Ratios (OR) of Mental Health Service Utilization among Currently Pregnant and Non-Pregnant Women with 12-Month and Lifetime DSM-IV Disorders.

|                                                           | Currently Pregnant Women (N=453) |        | Non-Pregnant Women (N=13,025) |       | OR                | AOR <sup>a</sup>  |
|-----------------------------------------------------------|----------------------------------|--------|-------------------------------|-------|-------------------|-------------------|
|                                                           | %                                | SE     | %                             | SE    |                   |                   |
| Past year treatment seeking for any disorder <sup>b</sup> | 5.9                              | (2.6)  | 16.5                          | (0.8) | 0.32 (0.12-0.82)  | 0.44 (0.16-1.17)  |
| Lifetime treatment seeking for any disorder <sup>b</sup>  | 27.2                             | (4.0)  | 41.0                          | (0.8) | 0.54 (0.36-0.81)  | 0.65 (0.42-0.99)  |
| Past year treatment seeking for alcohol disorder          | 15.4                             | (11.8) | 6.0                           | (0.9) | 2.82 (0.43-18.75) | 6.17 (0.71-53.61) |
| Life time treatment seeking for alcohol disorder          | 4.3                              | (2.2)  | 41.0                          | (0.8) | 0.36 (0.12-1.07)  | 0.45 (0.15-1.38)  |
| Past year treatment seeking for drug disorder             | 41.8                             | (21.0) | 17.0                          | (3.0) | 3.52 (0.58-21.41) | 5.74 (0.39-83.35) |
| Lifetime treatment seeking for drug disorder              | 12.7                             | (5.6)  | 15.3                          | (1.2) | 5.92 (1.17-29.88) | 9.54 (1.49-61.10) |
| Past year treatment seeking for mood disorder             | 8.3                              | (4.6)  | 25.5                          | (1.4) | 0.27 (0.08-0.88)  | 0.38 (0.11-1.27)  |
| Lifetime treatment seeking for mood disorder              | 51.3                             | (6.5)  | 61.1                          | (1.1) | 0.89 (0.43-1.85)  | 1.41 (0.66-3.02)  |
| Past year treatment seeking for anxiety disorder          | 0.5                              | (0.5)  | 11.6                          | (1.0) | 0.04 (0.00-0.29)  | 0.05 (0.01-0.38)  |
| Lifetime treatment seeking for anxiety disorder           | 16.2                             | (4.7)  | 29.0                          | (1.1) | 0.47 (0.23-0.95)  | 0.63 (0.30-1.32)  |

Abbreviations: SE, Standard Error; OR, Odds Ratio; AOR, Adjusted Odds Ratio; CI, 95% confidence interval.

<sup>a</sup> Odds ratios adjusted for race/ethnicity, nativity, age, marital status, education, and parity.

<sup>b</sup> Mental health service utilization among respondents with the specific 12-month or lifetime disorder (**disorder occurring prior to the past 12 months**).
